# Supplementary material
Source: HighWire-hosted journal article supplement (http://rc.rcjournal.com/highwire/filestream/18236/field_highwire_adjunct_files/0/CLEAN_ONLINE_SUPPLEMENT_REVISED.docx)
Supplement: CLEAN_ONLINE_SUPPLEMENT_REVISED.docx [file CLEAN_ONLINE_SUPPLEMENT_REVISED.docx]

**ONLINE SUPPLEMENT**

**Title:** In adults hospitalised with community-acquired pneumonia step count is reduced in those with greater clinical frailty.

**Author names, credentials, academic degrees and affiliations:**

Hayley Ricea,b (PT), Kylie Hilla,b,c (PT, PhD), Robin Fowlera,b (PT, PhD), Carol Watsona,b (PT, MBA), Grant Watererd,e (MD, PhD, FRACP, FCCP) and Megan Harrolda (PT, PhD).

1. School of Physiotherapy and Exercise Science, Faculty of Health Science, Curtin University, Perth, WA
2. Department of Physiotherapy, Royal Perth Hospital, Western Australia
3. Institute for Respiratory Health, Sir Charles Gairdner Hospital, Western Australia
4. Respiratory Medicine, Royal Perth Hospital, Western Australia
5. The University of Western Australia, Western Australia, Australia

**Author contributions:**

Hayley Rice: Study conception and design, data acquisition, data analysis, manuscript drafting, critical manuscript revision and final manuscript approval.

Kylie Hill: Study conception and design, data analysis, manuscript drafting, critical manuscript revision and final manuscript approval.

Robin Fowler: Study conception and design, data acquisition, critical manuscript revision and final manuscript approval.

Carol Watson: Study conception, critical manuscript revision and final manuscript approval.

Grant Waterer: Study conception, critical manuscript revision and final manuscript approval.

Megan Harrold: Study conception, critical manuscript revision and final manuscript approval.

**Institution:** This study was performed at Royal Perth Hospital, Perth, Western Australia.

**Sources of financial support:** Nil.

**Conflicts of interest:** There are no conflicts of interest to declare.

**Corresponding author:** Kylie Hill. Email: [K.Hill@curtin.edu.au](mailto:K.Hill@curtin.edu.au)

**Present address:**  School of Physiotherapy and Exercise Science, Faculty of Health Science, Curtin University, Perth, WA.

**S1. CURB-65 Score for Community-Acquired Pneumonia.**

| **Clinical factor** | **Points** |
| --- | --- |
| Confusion | 1 |
| Blood urea nitrogen > 19 mg per dL | 1 |
| Respiratory rate ≥ 30 breaths per minute | 1 |
| Systolic blood pressure < 90 mm Hg or  Diastolic blood pressure ≤ 60 mm Hg | 1 |
| Age ≥ 65 years | 1 |
| **Total points:** |  |

| **CURB-65 score** | **Deaths/total (%)*** | **Recommendation†** |
| --- | --- | --- |
| 0 | 7/1,223 (0.6) | Low risk; consider home treatment |
| 1 | 31/1,142 (2.7) |
| 2 | 69/1,019 (6.8) | Short inpatient hospitalization or closely supervised outpatient treatment |
| 3 | 79/563 (14.0) | Severe pneumonia; hospitalize and consider admitting to intensive care |
| 4 or 5 | 44/158 (27.8) |

CURB-65 = Confusion, Urea nitrogen, Respiratory rate, Blood pressure, 65 years of age and older.1

*—Data are weighted averages from validation studies2, 3

†—Recommendations are consistent with British Thoracic Society guidelines.4

**S2. Characteristics of participants who contributed StepWatch Activity Monitor data to the final analyses.**

| **Data** | **N = 121** |
| --- | --- |
| Age (yr) | 67.8 ± 16.8 |
| Males, n (%) | 74 (61) |
| Clinical Frailty Scale (score 1 to 7) | 3 [1] |
| CURB-65 (score 0 to 5) | 1 [1] |
| Presence of a pleural effusion, n (%) | 32 (26) |
| Total number of occasions of physiotherapy services | 2 [3] |
| Use of new supplemental oxygen, n (%) | 80 (66) |
| Independent ambulation with or without a walking stick prior to admission, n (%) | 101 (84) |
| Non (never)-smoker, n (%) | 35 (29) |
| Aboriginal or Torres Strait Islander | 8 (7) |
| Presence of a chronic respiratory comorbid condition, n (%) | 53 (44) |
| Presence of a cardiovascular comorbid condition, n (%) | 79 (65) |
| Presence of a metabolic condition, n (%) | 61 (50) |

Data are expressed as mean ± SD, median [IQR] or n (Y%). CURB-65, Confusion Urea, Respiratory rate, Blood pressure, Age ≥ 65 score.

**S3.** **Characteristics of participants according to clinical frailty.**

| **Variable** | ‘Frailty score < 4’  (frailty scores of 1 to 3)  N = 124 | ‘Frailty score ≥ 4’  (frailty scores of 4 to 7)  N = 76 | p value |
| --- | --- | --- | --- |
| Age (yr) | 59 ± 17 | 79 ± 12 | < 0.01 |
| Males, n (%) | 89 (72) | 40 (53) | 0.01 |
| CURB-65 | 1 [2] | 2 [1] | 0.12 |
| Previous independent ambulation with or without a walking stick, n (%) | 122 (98) | 43 (57) | < 0.01 |
| Non-smoker, n (%) | 41 (33) | 27 (36) | 0.43 |
| Aboriginal or Torres Strait Islander, n (%) | 16 (13) | 6 (8) | 0.36 |
| LOS (days) | 3 [3] | 5 [5] | < 0.01 |
| Inpatient mortality, n (%) | 0 (0) | 4 (5) | < 0.01 |
| 30-day GP presentations, n (%) (N = 144) | 65 (76) | 47 (81) | 0.29 |
| 30-day ED presentations, n (%) (N = 145) | 8 (9) | 12 (21) | 0.35 |
| 30-day readmissions, n (%) (N = 147) | 9 (10) | 13 (22) | < 0.01 |
| 30-day mortality, n (%) (N = 151) | 0 (0) | 3 (5) | < 0.01 |
| Average daily step count (N = 121) | 1201 [1355] steps | 516 [751] | 0.14 |

Data are expressed as mean ± SD or median [IQR] unless otherwise stated. yr, year; CURB-65, Confusion Urea, Respiratory rate, Blood pressure, Age ≥ 65 score; LOS: Length of stay.

**References**

1. Ebell MH. Outpatient vs. inpatient treatment of community acquired pneumonia. Fam Pract Manag 2006;13(4):41-44.

2. Aujesky D, Auble TE, Yealy DM, Stone RA, Obrosky DS, Meehan TP, et al. Prospective comparison of three validated prediction rules for prognosis in community-acquired pneumonia. Am J Med 2005;118(4):384-392.

3. Lim WS, van der Eerden MM, Laing R, Boersma W, Karalus N, Town GI, et al. Defining community acquired pneumonia severity on presentation to hospital: an international derivation and validation study. Thorax 2003;58(5):377-382.

4. British Thoracic Society. BTS Guidelines for the Management of Community Acquired Pneumonia in Adults. Thorax 2001;56 Suppl 4:Iv1-64.
